# Supplementary material
Source: ML conference proceedings conference paper supplement (https://openreview.net/forum?id=-16dlERMZkO)
Supplement: supplementary_material [file attachment]

---

# Private Non-smooth ERM and SCO in Subquadratic Steps

---

Janardhan Kulkarni\*

Yin Tat Lee †

Daogao Liu ‡

## Abstract

We study the differentially private Empirical Risk Minimization (ERM) and Stochastic Convex Optimization (SCO) problems for non-smooth convex functions. We get a (nearly) optimal bound on the excess empirical risk with  $O(\frac{N^{3/2}}{d^{1/8}} + \frac{N^2}{d})$  gradient queries, which is achieved with the help of subsampling and smoothing the function via convolution. Combining this result with the iterative localization technique of Feldman et al. [FKT20], we achieve the optimal excess population loss for the SCO problem with  $O(\min\{N^{5/4}d^{1/8}, \frac{N^{3/2}}{d^{1/8}}\})$  gradient queries. Our work makes progress towards resolving a question raised by Bassily et al. [BFGT20], giving first algorithms for private ERM and SCO with subquadratic steps. In a concurrent work Asi et al. [AFKT21] gave other algorithms for private ERM and SCO with subquadratic steps.

## 1 Introduction

Privacy has become an important consideration for learning algorithms dealing with sensitive data. Over the past decade, differential privacy, introduced in the seminal work of [DMNS06], has established itself as the defacto notion of privacy for machine learning problems. In this paper, we revisit Empirical Risk Minimization (ERM) and Stochastic Convex Optimization (SCO) problems, two fundamental problems in statistics and machine learning, in differential privacy setting. In the ERM problem, we are given a family of convex functions  $\{f(\cdot, x)\}_{x \in \Xi}$  over a bounded closed convex set  $\mathcal{K} \subset \mathbb{R}^d$  of diameter  $D$ , a data set  $S = \{x_1, \dots, x_N\}$  drawn from some unknown distribution  $\mathcal{P}$  over the universe  $\Xi$ , and the objective is to

$$\text{minimize } \widehat{F}(\omega) := \frac{1}{N} \sum_{x_i \in S} f(\omega, x_i) \quad \text{over } \omega \in \mathcal{K},$$

The excess empirical loss with respect to a solution  $\omega$  is defined by  $\widehat{F}(\omega) - \widehat{F}^*$ , where  $\widehat{F}^* = \min_{\omega \in \mathcal{K}} \widehat{F}(\omega)$ . A closely related but more general problem is SCO, where the objective is to

$$\text{minimize } F(\omega) := \mathbb{E}_{x \sim \mathcal{P}} f(\omega, x) \quad \text{over } \omega \in \mathcal{K},$$

We refer  $F(\omega) - F^*$  as the *excess population loss*, where  $F(\omega) = \mathbb{E}_{x \sim \mathcal{P}} f(\omega, x)$  and  $F^* = \min_{\omega \in \mathcal{K}} F(\omega)$ .

Differentially private convex optimization has been studied extensively for over a decade now [CM08, RBHT09, CMS11, KST12, JT14, TTZ14, BST14, TTZ15, KJ16, WLK<sup>+</sup>17, FTS17,

---

\*Algorithms Group, Microsoft Research (MSR) Redmond. jakul@microsoft.com

†University of Washington and Microsoft Research. Supported by NSF awards CCF-1749609, DMS-1839116, DMS-2023166, Microsoft Research Faculty Fellowship, Sloan Research Fellowship, Packard Fellowships. yintat@uw.edu

‡University of Washington. Part of the work was done while visiting Shanghai Qi Zhi Institute. dgliu@uw.edu.

[ZMW17, WYX17, INS<sup>+</sup>19]. Both DP-ERM and DP-SCO for smooth convex functions are well understood in the sense that we know (near) linear time algorithms that achieve optimal loss; we refer the readers to [WYX17, FKT20] for more details. However, for the more general non-smooth convex loss functions our understanding is not yet complete, which is the focus of this paper.

Our algorithms for DP-SCO build upon our improvements for the DP-ERM problem, and hence we begin with DP-ERM problem. A summary of the state-of-the-art results of DP-ERM and our contributions for the non-smooth convex loss functions is given in Table 1. We will discuss the concurrent work [AFKT21] separately at the end of the introduction, and the following discussion is only limited to the previous work.

|          | General Convex                                                                 | Strongly Convex                                                       | Gradient Complexity                       |
|----------|--------------------------------------------------------------------------------|-----------------------------------------------------------------------|-------------------------------------------|
| [KST12]  | $\frac{GD\sqrt{d}\log(1/\delta)}{\sqrt{N}\varepsilon}$                         | $\frac{G^2 d \log(1/\delta)}{\mu N^{3/2} \varepsilon^2}$              | N/A                                       |
| [BST14]  | $\frac{GD \log^{\frac{3}{2}}(N/\delta) \sqrt{d} \log(1/\delta)}{N\varepsilon}$ | $\frac{G^2 \log^2(N/\delta) d \log(1/\delta)}{\mu N^2 \varepsilon^2}$ | $N^2$                                     |
| [BFTT19] | $\frac{GD\sqrt{d}\log(1/\delta)}{N\varepsilon}$                                | $\frac{G^2 d \log(1/\delta)}{\mu N^2 \varepsilon^2}$                  | $N^{4.5}$                                 |
| [BFGT20] | $\frac{GD\sqrt{d}\log(1/\delta)}{N\varepsilon}$                                | $\frac{G^2 d \log(1/\delta)}{\mu N^2 \varepsilon^2}$                  | $N^2$                                     |
| [AFKT21] | $\frac{GD\sqrt{d}\log(1/\delta)}{N\varepsilon}$                                | $\frac{G^2 d \log(1/\delta)}{\mu N^2 \varepsilon^2}$                  | $N^2/\sqrt{d}$                            |
| Ours     | $\frac{GD\sqrt{d}\log(1/\delta)}{N\varepsilon}$                                | $\frac{G^2 d \log(1/\delta)}{\mu N^2 \varepsilon^2}$                  | $\frac{N^{3/2}}{d^{1/8}} + \frac{N^2}{d}$ |

Table 1: DP-ERM. Comparisons with previous  $(\varepsilon, \delta)$ -differential private algorithms when objective function is  $G$ -Lipschitz and convex (or  $\mu$ -strongly convex) over a convex set  $\mathcal{K} \subset \mathbb{R}^d$  of diameter  $D$ . The results are stated asymptotically and the big  $O$  notation is hidden for simplicity. The lower bound of General Convex function is  $\Omega(\min\{GD, \frac{GD\sqrt{d}}{N\varepsilon}\})$  and of Strongly Convex function is  $\Omega(\min\{\frac{G^2}{\mu}, \frac{G^2 d}{\mu N^2 \varepsilon^2}\})$  [BST14].

[KST12] used objective perturbation method to design a DP-algorithm with  $O(\frac{GD\sqrt{d}\log(1/\delta)}{\sqrt{N}\varepsilon})$  excess empirical risk. This result was improved significantly by [BST14], who first showed a lower bound of  $\Omega(\min\{GD, \frac{GD\sqrt{d}}{N\varepsilon}\})$  on the excess empirical risk for DP-ERM. Further, they gave an algorithm with excess empirical risk  $O(\frac{GD \log^{\frac{3}{2}}(N/\delta) \sqrt{d} \log(1/\delta)}{N\varepsilon})$ , which is sub-optimal by a factor of  $\log^{\frac{3}{2}}(N/\delta)$ . Their algorithm is based on a modification of SGD by adding Gaussian noise to the gradients to make it differentially private. The privacy analysis proceeds via amplification by sampling and the strong composition theorem. Roughly speaking, the logarithmic blowup in the excess empirical risk is due to two reasons: 1) The strong composition theorem requires that at each step one needs to add Gaussian noise with a larger variance; 2) They used sub-optimal convergence rate  $O(\log T/\sqrt{T})$  for  $T$ -step SGD.

However, getting the optimal bounds with small gradient complexity for non-smooth case turns out to be a more difficult problem. This was noted by [WYX17], who raised it as an important open problem. This question was answered in [BFTT19], who gave an algorithm with almost optimal excess empirical risk. To achieve this, [BFTT19] first consider the smooth case, and give an improved privacy analysis via the Moments Accountant technique proposed by [ACG<sup>+</sup>16]. They extend their result to non-smooth case by applying Moreau-Yosida envelope technique (a.k.a. Moreau envelope smoothing) [Nes05] to make the function smooth. However, this technique is computationally inefficient and leads to  $O(N^{4.5})$ -gradient computations for the whole algorithm. This limitation was overcome in a recent work of [BFGT20] who gave the optimal excess empirical risk guarantee with  $O(N^2)$ -gradient computations. The privacy analysis of this result also used Moments Accountant method, and they used the standard online-to-batch conversion technique [CBCG04] to prove the high-probability and expectation bound on the excess empirical error of SGD.

As we can see from Table 1, all the previously known results (except the concurrent work [AFKT21]) achieving near optimal excess empirical risk bounds require at least  $O(N^2)$ -gradient computations. As Table 2 shows, a similar situation arises in Stochastic Convex Optimization (SCO), which is a closely related problem compared to ERM. Many results for SCO [BST14, BFTT19, BFGT20] are directly based on ERM; that is, solving the ERM and analyzing the generalization error. The first non-trivial result for general convex loss functions achieving excess population loss of  $O\left(GD\left(\frac{d^{1/4}}{\sqrt{N}} + \frac{\sqrt{d}}{N\varepsilon}\right)\right)$  was given by [BST14], who showed the result by first solving the ERM prob-

lem and bounding the generalization error. They used the result on universal convergence directly, namely, bounding  $\sup_{\omega \in \mathcal{K}} \mathbb{E}[F(\omega) - \widehat{F}(\omega)]$ . But this method has its limitations; For example, [Fel16] showed that lower bound of universal convergence is  $\Omega(\sqrt{d/N})$  for some (not necessarily convex) loss functions. Later, [BFTT19], [FKT20] and [BFGT20] obtained near optimal excess population loss with significantly better running times (gradient complexity). The privacy analysis in these papers relied on recent advances in the privacy techniques such as the Moments Accountant method [ACG<sup>+</sup>16], Rényi differential privacy (RDP) [Mir17] and the Privacy Amplification by Iteration [FMTT18] and other fast stochastic convex optimization algorithms such as [JNN19]. The excess population loss bound in most of these works followed by solving a (phased) convex (regularized) ERM problem and then appealing to the uniform stability property [HRS16] or the iterative localization approach [FKT20] to do the generalization error analysis.

|          | General Convex                                                                             | Strongly Convex                                                           | Gradient Complexity                                |
|----------|--------------------------------------------------------------------------------------------|---------------------------------------------------------------------------|----------------------------------------------------|
| [BST14]  | $GD(\frac{d^{1/4} \log(n/\delta)}{\sqrt{N}} + \frac{d^{1/2} \log^2(n/\delta)}{N\epsilon})$ | N/A                                                                       | $N^2$                                              |
| [BFTT19] | $GD(\frac{1}{\sqrt{N}} + \frac{\sqrt{d \log(1/\delta)}}{N\epsilon})$                       | $\frac{G^2}{\mu} (\frac{1}{N} + \frac{d \log(1/\delta)}{N^2 \epsilon^2})$ | $N^{4.5}$                                          |
| [FKT20]  | $GD(\frac{1}{\sqrt{N}} + \frac{\sqrt{d \log(1/\delta)}}{N\epsilon})$                       | $\frac{G^2}{\mu} (\frac{1}{N} + \frac{d \log(1/\delta)}{N^2 \epsilon^2})$ | $N^2 \log(1/\delta)$                               |
| [BFGT20] | $GD(\frac{1}{\sqrt{N}} + \frac{\sqrt{d \log(1/\delta)}}{N\epsilon})$                       | $\frac{G^2}{\mu} (\frac{1}{N} + \frac{d \log(1/\delta)}{N^2 \epsilon^2})$ | $N^2$                                              |
| [AFKT21] | $GD(\frac{1}{\sqrt{N}} + \frac{\sqrt{d \log(1/\delta)}}{N\epsilon})$                       | $\frac{G^2}{\mu} (\frac{1}{N} + \frac{d \log(1/\delta)}{N^2 \epsilon^2})$ | $\min\{N^{3/2}, N^2/\sqrt{d}\}$                    |
| Ours     | $GD(\frac{1}{\sqrt{N}} + \frac{\sqrt{d \log(1/\delta)}}{N\epsilon})$                       | $\frac{G^2}{\mu} (\frac{1}{N} + \frac{d \log(1/\delta)}{N^2 \epsilon^2})$ | $\min\{N^{5/4} d^{1/8}, \frac{N^{3/2}}{d^{1/8}}\}$ |

Table 2: DP-SCO. Comparisons with previous  $(\epsilon, \delta)$ -differential private algorithms when objective function is  $G$ -Lipschitz and convex (or  $\mu$ -strongly convex) over a convex set  $\mathcal{K} \subset \mathbb{R}^d$  of diameter  $D$ . The results are stated asymptotically and the big  $O$  notation is hidden for simplicity. The lower bound of General Convex function is  $\Omega(GD(\frac{1}{\sqrt{N}} + \frac{\sqrt{d}}{N\epsilon}))$  and of Strongly Convex function is  $\Omega(\frac{G^2}{\mu} (\frac{1}{N} + \frac{d \log(1/\delta)}{N^2 \epsilon^2}))$  [BST14].

Despite these impressive improvements, as the Table 2 suggests, the previous algorithms that achieve the optimal excess population loss still require  $O(N^2)$ -gradient computations. Indeed, [BFGT20] write that ‘‘Proving that quadratic running time is necessary for general non-smooth DP-SCO is a very interesting open problem...’’. Understanding if the lower bound is the right answer to the above questions or one can design algorithms with subquadratic gradient complexity is the main motivation that spurred our work.

## 1.1 Our Contributions

The first contribution of this paper is to show that we can obtain subquadratic gradient complexity bound for ERM when the dimension is super constant. In particular, for the important regime of over-parameterization ( $d \geq N$ ), we achieve a bound of  $O(N^{1+3/8})$ . Let  $\mathcal{K}_r = \{y \mid y = \omega + z, \omega \in \mathcal{K}, z \in \mathbb{R}^d, \|z\|_2 \leq r\}$ . We now state the result formally.

**Theorem 1.1** (DP-ERM). *Suppose  $\mathcal{K} \subset \mathbb{R}^d$  is a closed convex set and  $\{f(\cdot, x)\}_{x \in \Xi}$  is a family of  $G$ -Lipschitz and convex functions over  $\mathcal{K}_r$ , where  $r = \frac{D\sqrt{d \log(1/\delta)}}{\epsilon N}$ <sup>4</sup>. For  $\epsilon, \delta \leq 1/2$ , given any sample set  $S$  consists of  $N$  samples from  $\Xi$  and arbitrary initial point  $\omega_0 \in \mathcal{K}$ , we have a  $(\epsilon, \delta)$ -differentially private algorithm  $\mathcal{A}$  which takes*

$$O\left(\frac{\epsilon N^{\frac{3}{2}}}{d^{1/8} \log^{1/4}(1/\delta)} + \frac{\epsilon^2 N^2}{d \log(1/\delta)}\right)$$

*gradient queries and outputs  $\omega_T$  such that  $\mathbb{E}[\widehat{F}(\omega_T) - \widehat{F}^*] = O\left(\frac{GD\sqrt{d \log(1/\delta)}}{\epsilon N}\right)$ , where  $D = \|\omega^* - \omega_0\|_2$ ,  $\widehat{F}(\omega) = \frac{1}{N} \sum_{x_i \in S} f(\omega, x_i)$ ,  $\widehat{F}^* = \min_{\omega \in \mathcal{K}} \widehat{F}(\omega)$ , and the expectation is taken over the randomness of the algorithm.*

<sup>4</sup>We only need consider the non-trivial case when  $\frac{\sqrt{d \log(1/\delta)}}{\epsilon N} \leq 1$ , or any feasible solution is good enough. This means that  $r = O(D)$ , which is a mild assumption.

Moreover, if  $\{f(\cdot, x)\}_{x \in \Xi}$  is also  $\mu$ -strongly convex over  $\mathcal{K}_r$ , we can meet the same gradient query complexity and get a solution  $\omega_T$  such that  $\mathbb{E}[\widehat{F}(\omega_T) - \widehat{F}^*] = O\left(\frac{G^2 d \log(1/\delta)}{\mu \varepsilon^2 N^2}\right)$ .

The main contribution of the paper is to use the above result to obtain a better gradient complexity for the SCO problem, answering the open problem in [BFGT20]. Combining our private ERM algorithm with the iterative localization technique [FKT20], we give the first algorithm achieving optimal error with strictly sub-quadratic steps for all dimensions.

**Theorem 1.2 (DP-SCO).** *Suppose  $\varepsilon, \delta \leq \frac{1}{2}$  and sample set  $S$  consists of  $N$  samples drawn i.i.d from a distribution  $\mathcal{P}$  over  $\Xi$ . Suppose  $\{f(\cdot, x)\}_{x \in \Xi}$  is convex and  $G$ -Lipschitz with respect to  $\ell_2$  norm and convex over  $\mathcal{K}_r$ , where  $r = \frac{D\sqrt{d \log(1/\delta)}}{\varepsilon N}$ , there is an  $(\varepsilon, \delta)$ -differentially private algorithm taking*

$$O\left(N + \min\left\{\sqrt{\varepsilon} N^{5/4} d^{1/8}, \frac{\varepsilon N^{3/2}}{d^{1/8} \log^{1/4}(1/\delta)}\right\}\right)$$

gradient queries to get a solution  $\omega_T$  such that  $\mathbb{E}[F(\omega_T) - F(\omega^*)] = O\left(GD\left(\frac{1}{\sqrt{N}} + \frac{\sqrt{d \log(1/\delta)}}{N\varepsilon}\right)\right)$ . Moreover, if  $\{f(\cdot, x)\}_{x \in \Xi}$  is also  $\mu$ -strongly convex over  $\mathcal{K}_r$ , we can meet the same gradient query complexity and get a solution  $\omega_T$  such that  $\mathbb{E}[F(\omega_T) - F(\omega^*)] = O\left(\frac{G^2}{\mu} \left(\frac{d \log(1/\delta)}{\varepsilon^2 N^2} + \frac{1}{N}\right)\right)$ .

Finally, we note that with straightforward modifications, our results can also capture the regularized ERM and SCO, where there is one more simple (and convex) function  $h(\omega)$  added to the objective function and the objective function takes the form  $\frac{1}{N} \sum_{x_i \in S} f(\omega, x_i) + h(\omega)$ , which show up often in the previous work such as [RBHT09, KST12, WYX17, INS<sup>+</sup>19].

## 1.2 Our Techniques

Most of the previous works [BST14, BFTT19, BFGT20] that achieve near optimal bounds for ERM and SCO are based on adaptations of SGD to make it differentially private. The information theoretic lower bound of  $\Omega(1/\sqrt{T})$  for  $T$ -step SGD may be one of the important reasons why we can not get subquadratic gradient complexity for non-smooth convex ERM easily. Consider the algorithm in [BFGT20] as an example. It needs to add Gaussian noise  $v \sim \mathcal{N}(0, \sigma^2 I_{d \times d})$  with  $\sigma^2 = \frac{G^2 \log(1/\delta)}{\varepsilon^2}$  to each gradient. By a standard analysis of SGD, we can only show an excess empirical risk of  $\Theta\left(\frac{D\sqrt{d\sigma^2}}{\sqrt{T}}\right)$ , which requires us to set  $T = \Omega(N^2)$  to get ideal bound, thus hitting the quadratic barrier.

We deviate from the above approaches for designing private algorithms for non-smooth functions. First notice that the gradient complexity

$O\left(\frac{\varepsilon N^{\frac{3}{2}}}{d^{1/8} \log^{1/4}(1/\delta)} + \frac{\varepsilon^2 N^2}{d \log(1/\delta)}\right)$  in Theorem 1.1 is the same for both strongly convex and general non-smooth functions; same holds for DP-SCO.

This is not a coincidence; We prove that if we can achieve optimal empirical risk (population loss) for one case, then we can achieve optimal empirical risk (population loss) for another with the same privacy guarantee and gradient complexity. The Figure 1 illustrates the relationship among these different problems.

Our result for the general convex non-smooth case is obtained by providing a reduction to the strongly convex non-smooth case. Thus, our task becomes designing better algorithms for the strongly convex non-smooth functions. Rather than using SGD, we let the objective function take convolution with a sphere kernel to make it smooth. We then use the accelerated stochastic approximation algorithm in

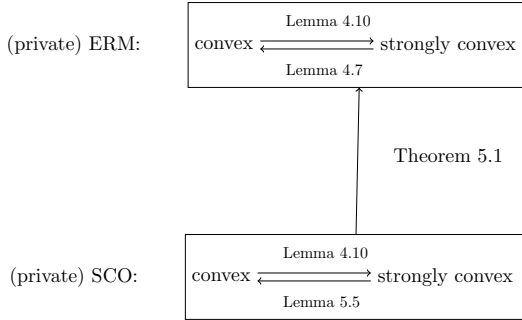

Figure 1: Reductions between ERM and SCO for general convex and strongly convex cases. As the lower bound of excess population loss is  $\Omega\left(GD\left(\frac{1}{\sqrt{N}} + \frac{\sqrt{d}}{N\varepsilon}\right)\right)$  while the lower bound of empirical risk is  $\Omega\left(\frac{GD\sqrt{d}}{N\varepsilon}\right)$ , we do not know how to reduce from ERM to SCO.

[GL12] for solving strongly convex stochastic optimization problems. However, this is not enough, as the required noise that needs to be added to the gradients to make the algorithm private is too large to get subquadratic gradient complexity, even if we use the tighter Moments Accountant technique [ACG<sup>+</sup>16]. We overcome this by increasing the batch size to an appropriate value. Combining these ideas together, we show that the amount of noise we add can be reduced to achieve the optimal excess empirical loss, and we get the gradient complexity of  $O(\max\{N^{3/2}/d^{1/8}, N^2/d\})$ .

For SCO, we get the gradient complexity of  $O(\min\{N^{5/4}d^{1/8}, N^{3/2}/d^{1/8}\})$  via application of the iterative localization approach of Feldman et al [FKT20]. The intuition behind iterative localization is using private ERM to solve regularized objective functions which have low sensitivity, iteration by iteration. Each iteration reduces the distance to an approximate minimizer by a multiplicative factor, so after logarithmic number of phases we are done.

### 1.3 Concurrent and Independent Work

In an independent and concurrent work, [AFKT21] give a new analysis of private regularized mirror descent to do the private ERM. Then they combine the iterative localization approach to achieve the optimal excess population loss for SCO. Their result also achieves subquadratic gradient complexity.

More formally, they get  $O(\log N \cdot \min(N^{3/2}\sqrt{\log d}, N^2/\sqrt{d}))$  for SCO in query complexity. We compare their gradient complexity with ours in the figure to right. As we see, our result is better in the important regime  $d \leq N^{1+1/3}$ . Same holds true for ERM. Finally, we remark that the main motivation of [AFKT21] was to study SCO problem in more general  $\ell_p$  norms as much of the literature has focused on the  $\ell_2$ -norm. They also give new results in  $\ell_p$ -bounded domain together with another concurrent work [BGN21].

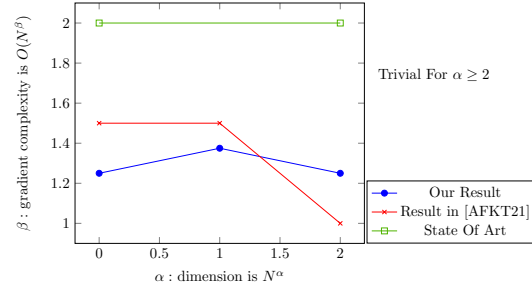

Figure 2: Comparison among our results, the recent result in [AFKT21] and the previous best one for the non-trivial regime ( $d \leq N^2$ ). Suppose  $\varepsilon, \delta$  are small constants. Our result is faster for the important case  $d \leq N^{1+1/3}$ .

## 2 Preliminaries

In this section, we briefly recall some of the main definitions we use from the convex optimization theory and differential privacy. We refer the readers to excellent books [Nes05, DR14] for more details on these topics.

### 2.1 Convex Optimization

**Definition 2.1** (Empirical risk minimization, Stochastic Convex Optimization). Let  $\mathcal{K} \subset \mathbb{R}^d$  be a closed convex set of diameter  $D$ . Given a family of convex loss functions  $\{f(\omega, x)\}_{x \in \Xi}$  of  $\omega$  over  $\mathcal{K}$  and a set of samples  $S = \{x_1, \dots, x_n\}$  over the universe  $\Xi$ , the objective of Empirical Risk Minimization (ERM) is to minimize

$$\widehat{F}(\omega) = \frac{1}{N} \sum_{x_i \in S} f(\omega, x_i).$$

The excess empirical loss with respect to a solution  $\omega$  is defined by  $\widehat{F}(\omega) - \widehat{F}^*$ , where  $\widehat{F}^* = \min_{\omega \in \mathcal{K}} \widehat{F}(\omega)$ .

Stochastic Convex Optimization (SCO) wants to output a solution  $\omega$  to minimize the expected loss (also referred to *population loss*)  $F(\omega) - F^*$  where  $F(\omega) = \mathbb{E}[x \sim \mathcal{P}]f(\omega, x)$  and  $F^* = \min_{\omega \in \mathcal{K}} F(\omega)$ .

**Definition 2.2** ( $L$ -Lipschitz Continuity). A function  $f : \mathcal{K} \rightarrow \mathbb{R}$  is  $L$ -Lipschitz continuous over the domain  $\mathcal{K} \subset \mathbb{R}^d$  if the following holds for all  $\omega, \omega' \in \mathcal{K}$ :  $|f(\omega) - f(\omega')| \leq L\|\omega - \omega'\|_2$ .

**Definition 2.3** ( $\beta$ -Smoothness). A function  $f : \mathcal{K} \rightarrow \mathbb{R}$  is  $\beta$ -smooth over the domain  $\mathcal{K} \subset \mathbb{R}^d$  if for all  $\omega, \omega' \in \mathcal{K}$ ,  $\|\nabla f(\omega) - \nabla f(\omega')\|_2 \leq \beta \|\omega - \omega'\|_2$ .

**Definition 2.4** ( $\mu$ -Strongly convex). A differentiable function  $f : \mathcal{K} \rightarrow \mathbb{R}$  is called strongly convex with parameter  $\mu > 0$  if the following inequality holds for all points  $\omega, \omega' \in \mathcal{K}$ ,

$$\langle \nabla f(\omega) - \nabla f(\omega'), \omega - \omega' \rangle \geq \mu \|\omega - \omega'\|_2^2.$$

Equivalently,

$$f(\omega') \geq f(\omega) + \nabla f(\omega)^\top (\omega' - \omega) + \frac{\mu}{2} \|\omega' - \omega\|_2^2.$$

## 2.2 Differential Privacy

**Definition 2.5** (Differential privacy). A randomized mechanism  $\mathcal{M}$  is  $(\varepsilon, \delta)$ -differentially private if for any event  $\mathcal{O} \in \text{Range}(\mathcal{M})$  and for any neighboring databases that differ in a single data element, one has

$$\Pr[\mathcal{M}(S) \in \mathcal{O}] \leq \exp(\varepsilon) \Pr[\mathcal{M}(S') \in \mathcal{O}] + \delta.$$

**Lemma 2.6** (Proposition 2.1 in [DR14]). (*Post-Processing*) Let  $\mathcal{M} : \mathbb{N}^{|\Xi|} \rightarrow R$  be a randomized algorithm that is  $(\varepsilon, \delta)$ -differentially private. Let  $f : R \rightarrow R'$  be an arbitrary randomized mapping. Then  $f \circ \mathcal{M} : \mathbb{N}^{|\Xi|} \rightarrow R'$  is  $(\varepsilon, \delta)$ -differentially private.

**Theorem 2.7** (Basic Composition). Let  $\mathcal{M}_i : \mathbb{N}^{|\Xi|} \rightarrow R_i$  be  $(\varepsilon_i, \delta_i)$ -differentially private. Then if mechanism  $\mathcal{M}_{[k]} : \mathbb{N}^{|\Xi|} \rightarrow \prod_{i=1}^k R_i$  is defined to be  $\mathcal{M}_{[k]}(x) = (\mathcal{M}_1(x), \dots, \mathcal{M}_k(x))$ , then  $\mathcal{M}_{[k]}$  is  $(\sum_{i=1}^k \varepsilon_i, \sum_{i=1}^k \delta_i)$ -differentially private.

## 3 A Meta Algorithm for DP Convex Optimization

Many convex optimization algorithms with noisy first-order information have the following simple format.

---

### Algorithm 1: Meta Algorithm META

---

- 1 **Input:** The objective convex function  $F(\omega)$  we want to minimize, an initial point  $\omega_0$ .
  - 2 **Process:** for phases  $t = 1, \dots$ , **do**
  - 3     Get the noisy gradient  $G_t \approx \nabla F(\omega_{t-1})$ ;
  - 4     Update the result by some sub-procedure:  $\omega_t \leftarrow \text{Sub-procedure}(\omega_{t-1}, G_t)$ ;
  - 5 **end**
  - 6 **Output:** Some function of  $\{\omega_i\}_{i \geq 1}$ .
- 

We can use the above algorithmic framework to solve ERM privately. Specifically, we make two simple modifications to make it private. First, we compute gradients over a uniform sample of some size  $B$ . Next, we add a carefully calibrated Gaussian noise to these gradients and take average, before updating our results. This gives us a meta differentially private algorithm for convex optimization problems, and is described in Algorithm 2. The DP analysis then follows from a careful accounting of the privacy budget lost in each iteration, and the bound on excess empirical risk comes from the property of the optimization algorithm.

---

### Algorithm 2: Private Meta Algorithm META<sub>DP</sub>

---

- 1 **Input:** Sample set  $S = \{x_1, \dots, x_N\}$ , the objective convex function  $F(\omega)$  we want to minimize, the initial point  $\omega_0$ , and privacy parameter  $\varepsilon, \delta$ ;
  - 2 **Process:** for phases  $t = 1, \dots, T$  **do**
  - 3     Select a random sample set  $S_t$  from the uniform distribution over all subsets of  $S$  of size  $B$ ;
  - 4     Let  $G_t = (\sum_{x_i \in S_t} \nabla f(\omega_{t-1}, x_i) + v)/B$ , where  $v \sim \mathcal{N}(0, \sigma^2 I_{d \times d})$ ;
  - 5     Update the result by some sub-procedure  $\omega_t \leftarrow \text{Sub-procedure}(\omega_{t-1}, G_t)$ ;
  - 6 **end**
  - 7 **Output:** Some function of  $\{\omega_i\}_{i \geq 1}$ .
- 

The above framework is a sub-sampled Gaussian mechanism, for which we can use tCDP proposed in [BDRS18] to analyze its privacy guarantee.



**Theorem 3.1.** Suppose  $\{f(\cdot, x)\}_{x \in \Xi}$  is a family of  $G$ -Lipschitz and convex functions over  $\mathcal{K}$ , for  $\varepsilon < c_1 B^2 T / N^2$ ,  $B \leq N/10$  and  $1/2 \geq \delta > 0$ , by setting  $\sigma = \frac{c_2 G B \sqrt{T \log(1/\delta)}}{\varepsilon N}$  for some constant  $c_1$  and  $c_2$ ,  $\text{META}_{\text{DP}}$  is  $(\varepsilon, \delta)$ -differential private.

As mentioned before, we can use the result in [BDRS18] to give a formal proof of our result. Before we start, let us define something necessary.

**Definition 3.2** (Truncated CDP). Let  $\rho > 0$  and  $\omega > 1$ . A randomized algorithm  $\mathcal{M} : \mathbb{N}^{|\Xi|} \rightarrow R$  satisfies  $\omega$ -truncated  $\rho$ -concentrated differential privacy (or  $(\rho, \omega)$ -tCDP) if for all neighboring  $S, S'$  that differ in a single entry,

$$\forall \alpha \in (1, \omega), D_\alpha(\mathcal{M}(S) \| \mathcal{M}(S')) \leq \rho \alpha,$$

where  $D_\alpha(\cdot \| \cdot)$  denotes the Rényi divergence [Rén61] of order  $\alpha$  (in nats, rather than bits).

Similar to classic differential privacy, tCDP also enjoys a property of composition:

**Lemma 3.3** (Composition of tCDP). Let  $\mathcal{M}_1 : \mathbb{N}^{|\Xi|} \rightarrow R_1$  satisfy  $(\rho, \omega)$ -tCDP and let  $\mathcal{M}_2 : \mathbb{N}^{|\Xi|} \times R_1 \rightarrow R_2$  satisfy  $(\rho', \omega')$ -tCDP for all  $y \in R_1$ . Define  $\mathcal{M} : \mathbb{N}^{|\Xi|} \rightarrow R_3$  by  $\mathcal{M}(S) = \mathcal{M}_2(S, \mathcal{M}_1(S))$ . Then  $\mathcal{M}$  satisfies  $(\rho + \rho', \min\{\omega, \omega'\})$ -tCDP.

Now we state the main result of [BDRS18]:

**Theorem 3.4** (Privacy Amplification By Subsampling). Let  $\rho, s \in (0, 0.1]$  and  $B, N \in \mathbb{N}$  with  $q = B/N$  and  $\log(1/q) \geq 3\rho(2 + \log_2(1/\rho))$ . Let  $\mathcal{M} : \mathbb{N}^{|\Xi|} \rightarrow R$  satisfy  $(\rho, \omega')$ -tCDP for  $\omega' \geq \frac{\log(1/q)}{2\rho} \geq 3$ . Define the mechanism  $\mathcal{M}_q : \mathbb{N}^{|\Xi|} \rightarrow R$  by  $\mathcal{M}_q(S) = \mathcal{M}(S_q)$  where  $S_q \in \mathbb{N}^{|\Xi|}$  is the restriction of  $S$  to the entries specified by a uniformly random subset of size  $B$ .

The algorithm  $\mathcal{M}_q$  satisfies  $(13q^2\rho, \omega)$ -tCDP for

$$\omega = \frac{\log(1/q)}{4\rho}.$$

This theorem can apply to our algorithm  $\text{META}_{\text{DP}}$  directly, as we are using subsampling without replacement. More specifically, we are using subsampling Gaussian Mechanism, and for Gaussian Mechanism we have the following fact:

**Fact 3.5.** Let  $P = \mathcal{N}(1, 1/2\rho)$  and  $Q = \mathcal{N}(0, 1/2\rho)$ . Then  $D_\alpha(P \| Q) = \rho\alpha$  for all  $\alpha \in (1, \infty)$ . In other word, the Gaussian Mechanism with sensitive 1 satisfies  $(\rho, \infty)$ -tCDP.

Now we are ready for our proof.

*Proof of Theorem 3.1.* For the  $t$ -th phase of  $\text{META}_{\text{DP}}$ , let  $\mathcal{M}(S) = \sum_{x \in S} \nabla f(\omega_{t-1}, x) + v$  where  $v \sim \mathcal{N}(0, \sigma^2 I_{d \times d})$ . As we are considering  $G$ -Lipschitz function  $f$ , then we know that  $\|\nabla(f)\|_2 \leq G$ , which means that  $\mathcal{M}$  is  $(\rho, \infty)$ -tCDP where  $\rho = G^2/(2\sigma^2)$ .

Assume our parameters satisfy the precondition of Theorem 3.4 first, then we know that the  $t$ -th phase of  $\text{META}_{\text{DP}}$  is  $(13q^2\rho, 1/\rho)$ -tCDP. By the composition property (Lemma 3.3), we know that  $\text{META}_{\text{DP}}$  is  $(13Tq^2\rho, 1/\rho)$ -tCDP.

When  $Tq^2\rho \cdot \frac{\log(1/\delta)}{\varepsilon} \leq O(\varepsilon)$  and  $\frac{\log(1/\delta)}{\varepsilon} \leq O(\frac{1}{\rho})$ , we know that  $\text{META}_{\text{DP}}$  is  $(\varepsilon, \delta)$ -differentially private [BDRS18].

By setting  $\sigma = \frac{c_2 G B \sqrt{T \log(1/\delta)}}{\varepsilon N}$ , we have that  $\rho = \frac{\varepsilon^2 N^2}{2c_2^2 B^2 T \log(1/\delta)}$ . Together with the assumption  $\varepsilon \leq c_1 B^2 T / N^2$ , we have both  $Tq^2\rho \cdot \frac{\log(1/\delta)}{\varepsilon} \leq O(\varepsilon)$  and  $\frac{\log(1/\delta)}{\varepsilon} \leq O(\frac{1}{\rho})$  as claimed. This completes the proof.  $\square$

## 4 Differentially Private ERM

In this section, we present private algorithms achieving the optimal excess empirical loss with subquadratic gradient complexity when the dimension is super constant. We consider non-smooth strongly-convex functions first, and then show how to reduce the general non-smooth case to the strongly-convex case in the last subsection.

## 4.1 Non-smooth Strongly-convex Functions

We use the framework introduced in Section 3 and give a faster private algorithm. Specifically, we modify a stochastic convex optimization algorithm in [GL12] to fit into our framework. First we recall some properties of that algorithm.

Suppose  $f : \mathcal{K} \rightarrow \mathbb{R}$  is a convex function, and the objective is to get

$$\Psi^* := \min_{\omega \in \mathcal{K}} \{\Psi(\omega) = f(\omega) + h(\omega)\},$$

where  $\mathcal{K}$  is a closed convex set and  $h(\omega)$  is a simple convex function with known structure.

**Theorem 4.1** (Proposition 9 in [GL12]). *If the following conditions are met:*

- For some  $L \geq 0, M \geq 0$  and  $\mu > 0$ ,

$$\frac{\mu}{2} \|y - \omega\|_2^2 \leq f(y) - f(\omega) - \langle g(\omega), y - \omega \rangle \leq \frac{L}{2} \|y - \omega\|_2^2 + M \|y - \omega\|_2, \quad \forall \omega, y \in \mathcal{K},$$

where  $g(\omega) \in \partial f(\omega)$  and  $\partial f(\omega)$  denotes the sub-differential of  $f$  at  $\omega$ .

- For each call of the stochastic oracle  $\mathcal{G}$  with the input  $\omega_t \in \mathcal{K}$ , the stochastic oracle  $\mathcal{G}$  can output an independent vector  $\mathcal{G}(\omega_t)$  such that  $\mathbb{E}[\mathcal{G}(\omega_t)] \in \partial f(\omega_t)$ .
- For any  $t \geq 1$  and  $\omega_t \in \mathcal{K}$ ,  $\mathbb{E}[\|\mathcal{G}(\omega_t) - g(\omega_t)\|_2^2] \leq V$ .

Then after  $T$  iterations, Algorithm 3 given below outputs  $\omega_T$  such that

$$\mathbb{E}[\Psi(\omega_T) - \Psi^*] \leq O\left(\frac{L\|\omega_0 - \omega^*\|_2^2}{T^2} + \frac{M^2 + V}{\mu T}\right),$$

where  $\omega^* = \arg \min_{\omega \in \mathcal{K}} \Psi(\omega)$  and  $\Psi^* = \Psi(\omega^*)$ .

---

### Algorithm 3: Accelerated stochastic approximation (AC-SA) algorithm

---

- 1 **Input:** Initial point  $\omega_0 \in \mathcal{K}$ .
  - 2 **Initialization:** Set the initial point  $\omega_0^{ag} = \omega_0$ ;
  - 3 Set the step-size parameters  $\alpha_t = \frac{2}{t+2}$  and  $\gamma_t = \frac{4L}{t(t+1)}$ ;
  - 4 **Process:**
  - 5 **for**  $t = 1, \dots, T$  **do**
  - 6     Let  $\omega_t^{md} = \frac{(1-\alpha_t)(\mu+\gamma_t)}{\gamma_t+(1-\alpha_t^2)\mu} \omega_{t-1}^{ag} + \frac{\alpha_t[(1-\alpha_t)\mu+\gamma_t]}{\gamma_t+(1-\alpha_t^2)\mu} \omega_{t-1}$ ;
  - 7     Query Oracle  $\mathcal{G}_t \equiv \mathcal{G}(\omega_t^{md})$ ;
  - 8     Let  $\omega_t = \arg \min_{\omega \in \mathcal{K}} \{\alpha_t[\langle \mathcal{G}_t, \omega \rangle + h(\omega) + \mu\|\omega_t^{md} - \omega\|_2^2] + [(1-\alpha_t)\mu + \gamma_t]\|\omega_{t-1} - \omega\|_2^2\}$ ;
  - 9      $\omega_t^{ag} = \alpha_t \omega_t + (1-\alpha_t)\omega_{t-1}^{ag}$ ;
  - 10 **end**
  - 11 **Return:**  $\omega_T^{ag}$ .
- 

#### 4.1.1 Smoothing function

From the statement of Theorem 4.1, it is clear that the Algorithm 3 gives much better convergence rates for smooth functions. As we are considering non-smooth functions, we need an efficient way to smooth the objective function without introducing too much error. In the next few paragraphs, we show how to achieve that.

Recall that  $D$  denotes the diameter of the closed convex set  $\mathcal{K} \subset \mathbb{R}^d$ . Suppose  $\{f(\cdot, x)\}_{x \in \Xi}$  is a family of  $G$ -Lipschitz and  $\mu$ -strongly convex functions over  $\mathcal{K}$ . This implies that for any sample set  $S$ , the empirical loss function  $\hat{F}(\omega)$  we consider is  $G$ -Lipschitz and  $\mu$ -strongly convex over the domain  $\mathcal{K}$ .

We do a convolution on  $f(\cdot, x)$ , which is denoted by  $f(\cdot, x) * n_r$ . The objective function after the convolution step becomes  $\hat{F}_{n_r}(\omega) = \frac{1}{N} \sum_{x_i \in S} \mathbb{E}_{y \sim n_r} f(\omega + y, x_i)$ , where  $n_r$  is the uniform density on the  $\ell_2$  ball of radius  $r$ . We need the following claim:



**Claim 4.2.** Suppose  $\{f(\cdot, x)\}_{x \in \Xi}$  is convex and  $G$ -Lipschitz over  $\mathcal{K} + B_2(0, r)$ . For  $\omega \in \mathcal{K}$ ,  $\widehat{F}_{n_r}(\omega)$  has following properties:

- $\widehat{F}(\omega) \leq \widehat{F}_{n_r}(\omega) \leq \widehat{F}(\omega) + Gr$ ;
- $\widehat{F}_{n_r}(\omega)$  is  $G$ -Lipschitz;
- $\widehat{F}_{n_r}(\omega)$  is  $\frac{G\sqrt{d}}{r}$ -Smooth;
- For random variables  $y \sim n_r$  and  $x$  uniformly from  $S$ , one has

$$\mathbb{E}[\nabla f(\omega + y, x)] = \nabla \widehat{F}_{n_r}(\omega)$$

and

$$\mathbb{E}[\|\nabla \widehat{F}_{n_r}(\omega) - \nabla f(\omega + y, x)\|_2^2] \leq G^2.$$

The properties 1)-3) of this claim come from Lemma 7 and Lemma 8 in [YNS12] while the forth follows from Lemma E.2 in [DBW12]. Furthermore, the convolution operation preserves strong convexity, which implies the fact below.

**Fact 4.3.** Let  $n_r$  be the uniform density on the  $\ell_2$  ball of radius  $r$ , and  $f : \mathcal{K}_r \rightarrow \mathbb{R}$  be a  $\mu$ -strongly convex function over  $\mathcal{K}_r$ . Then  $\mathbb{E}_{y \sim n_r} f(y + \cdot)$  is  $\mu$ -strongly convex over  $\mathcal{K}$ .

#### 4.1.2 Algorithm

Now we state the our modifications to make AC–SA private and prove its properties. Recall that  $y \sim n_r$  is a  $d$ -dimension vector drawn from the uniform density on the  $\ell_2$  ball of radius  $r$ . We start with the description of our algorithm.

---

#### Algorithm 4: Private AC–SA

---

- 1 **Input:** A convex set  $\mathcal{K}$  with diameter  $D$ , a family  $\{f(\cdot, x_i)\}_{i \in [N]}$  of  $G$ -Lipschitz and  $\mu$ -strongly convex functions over  $\mathcal{K}$ , an initial point  $\omega_0 \in \mathcal{K}$ , privacy parameters  $\varepsilon, \delta$ , the batch size  $B$ , and the number of steps  $T$ .
  - 2 Set  $r \leftarrow \frac{D}{Td^{1/4}}$  and  $\sigma \leftarrow \Theta\left(\frac{GB\sqrt{T \log(1/\delta)}}{\varepsilon N}\right)$ ;
  - 3 Run the AC–SA with the Oracle  $\mathcal{G}$  defined below;
  - 4 **Return:** The output of AC–SA
  - 5 **Oracle  $\mathcal{G}(\omega)$ :**
  - 6 Select a random sample set  $S_t$  from the uniform distribution over all subsets of  $S$  of size  $B$ .
  - 7 **Return:**  $(\sum_{x_i \in S_t} \partial f(\omega + y_i, x_i) + v)/B$ , where  $y_i \sim n_r$  for each  $i \in [B]$  and  $v \sim \mathcal{N}(0, \sigma^2 \mathbf{I}_{d \times d})$ .
- 

#### 4.1.3 Utility and Privacy

It is not hard to show that Private AC–SA (Algorithm 4) is an instance of  $\text{META}_{\text{DP}}$  (see Section 3), so we have the following guarantee directly by Theorem 3.1.

**Lemma 4.4.** For  $\varepsilon \leq c_1 B^2 T / N^2$ ,  $\delta \leq 1/2$ ,  $B \leq N/10$  and  $\sigma = \frac{c_2 GB\sqrt{T \log(1/\delta)}}{\varepsilon N}$  where  $c_1 \leq 1$ ,  $c_2 \geq 1$  are constants, Private AC–SA is  $(\varepsilon, \delta)$ -DP.

Now we consider the accuracy of Private AC–SA.

**Lemma 4.5.** Under the assumptions defined in Algorithm Private AC–SA, after  $T$  iterations, it outputs  $\omega_T$  such that

$$\mathbb{E}[\widehat{F}(\omega_T) - \widehat{F}^*] = O\left(\frac{G^2/B + \sigma^2 d/B^2}{\mu T} + \frac{GDd^{1/4}}{T}\right),$$

where  $\omega^* = \arg \min_{\omega \in \mathcal{K}} \widehat{F}(\omega)$ , and  $\widehat{F}^* = \min_{\omega} \widehat{F}(\omega)$ .

*Proof.* By Claim 4.2, we know that  $\widehat{F}_{n_r}$  is  $G$ -Lipschitz and  $\frac{G\sqrt{d}}{r}$ -smooth. Furthermore, by Fact 4.3, we know that  $\widehat{F}_{n_r}$  is  $\mu$ -strongly convex. For any  $t$ th iteration, one has that  $\mathbb{E}[\mathcal{G}_t] = \nabla \widehat{F}_{n_r}(\omega_t^{md})$  and  $\mathbb{E}[\|\mathcal{G}_t - \nabla \widehat{F}_{n_r}(\omega_t^{md})\|_*^2] \leq G^2/B + \sigma^2 d/B^2$ . Then by Theorem 4.1 with  $M = 0, L = \frac{G\sqrt{d}}{r}, V = G^2/B + \sigma^2 d/B^2$ , we get

$$\mathbb{E}[\widehat{F}_{n_r}(\omega_T) - \min_{\omega} \widehat{F}_{n_r}(\omega)] = O\left(\frac{G^2/B + \sigma^2 d/B^2}{\mu T} + \frac{GD^2\sqrt{d}}{T^2 r}\right).$$

Next, by the first bullet of Claim 4.2, we know that  $\widehat{F}(\omega) \leq \widehat{F}_{n_r}(\omega) \leq \widehat{F}(\omega) + Gr$  for any  $\omega$ . Combining these together, we get

$$\begin{aligned} & \mathbb{E}[\widehat{F}(\omega_T) - \widehat{F}(\omega^*)] \\ &= \mathbb{E}[\widehat{F}(\omega_T) - \widehat{F}_{n_r}(\omega_T)] + \mathbb{E}[\widehat{F}_{n_r}(\omega_T) - \min_{\omega} \widehat{F}_{n_r}(\omega)] + \min_{\omega} \widehat{F}_{n_r}(\omega) - \widehat{F}(\omega^*) \\ &\leq 2Gr + O\left(\frac{G^2/B + \sigma^2 d/B^2}{\mu T} + \frac{GD^2\sqrt{d}}{T^2 r}\right). \end{aligned}$$

By setting  $r = \frac{Dd^{1/4}}{T}$ , we completes the proof.  $\square$

Before stating the main result of this section, we prove two technical lemmas that can remove the dependence on the diameter term. Lemma 4.6 below is used to prove Lemma 4.7.

**Lemma 4.6.** *Consider a sequence  $x_1, x_2, \dots$ . Suppose  $0 \leq x_1 \leq n$  and  $0 \leq x_{i+1} \leq \sqrt{x_i} + 1$ , then for  $k \geq \lceil \log \log n \rceil$ , one has that  $x_k \leq 16$ .*

*Proof.* Without loss of generality, let  $x_{i+1} = \sqrt{x_i} + 1$ .

We construct another sequence  $y_1, \dots, y_k$  such that  $y_1 = x_1$  and  $y_{i+1} = 2\sqrt{y_i}$ . Then by induction, it is easy to prove that for each  $i \in [k]$ ,  $y_i \geq x_i$ . So we only need to prove that  $y_k \leq 16$ .

Let  $z_i = \log_2 y_i$ , then one has  $z_{i+1} = z_i/2 + 1$ . Obviously, we know that  $z_i = 2^{-i+1}(z_1 - 2) + 2$  and  $z_k \leq 4$ , which means that  $x_k \leq y_k \leq 16$ .  $\square$

Recall that the lower bound of strongly convex case is  $\Omega(\min\{\frac{G^2}{\mu}, \frac{G^2 d \log(1/\delta)}{\mu \varepsilon^2 N^2}\})$  while for the general case is  $\Omega(\min\{GD, \frac{GD\sqrt{d \log(1/\delta)}}{\varepsilon N}\})$ . Therefore, we only need to think about the case when  $\frac{d \log(1/\delta)}{\varepsilon^2 N^2} \leq 1$ , or the bound will be trivial. The following lemma says if we can achieve sum of these two lower bounds for strongly-convex case, then we can achieve the optimal bound for the strongly-convex case, which implies we can reduce the Strongly-Convex Case to General Convex Case. The following lemma follows from the reduction in Section 5.1 in [FKT20], and we try to give a more formal statement for convenience in the future.

**Lemma 4.7** (Reduction to General Convex Case). *Given  $\widehat{F}$  is  $G$ -Lipschitz and  $\mu$ -strongly convex. Suppose for any  $\varepsilon, \delta < 1/2$ , we have an  $(\varepsilon, \delta)$ -differentially private algorithm  $\mathcal{A}$  which takes  $\omega_0$  as the initial start point and outputs a solution  $\omega_T$  such that*

$$\mathbb{E}[\widehat{F}(\omega_T) - \widehat{F}^*] = O\left(\frac{G^2 d \log(1/\delta)}{\mu \varepsilon^2 N^2} + \frac{GD\sqrt{d \log(1/\delta)}}{\varepsilon N}\right),$$

where  $\omega^* = \arg \min_{\omega \in \mathcal{K}} \widehat{F}(\omega)$  and  $D = \|\omega_0 - \omega^*\|_2$ . Then by taking  $\mathcal{A}$  as sub-procedure with some modifications on parameters, we can get an  $(\varepsilon, \delta)$ -differentially private solution with excess empirical loss at most

$$\mathbb{E}[\widehat{F}(\omega_T) - \widehat{F}^*] = O\left(\frac{G^2 d \log(1/\delta)}{\mu \varepsilon^2 N^2}\right).$$

Furthermore, if  $\mathcal{A}$  uses  $g(N, \varepsilon, \delta)$  many gradients, the new algorithm uses  $\sum_{i \geq 1} g(N, \varepsilon/2^i, \delta/2^i)$  many gradients.

*Remark 4.8.* All algorithms in this paper uses less gradients if  $\varepsilon$  and  $\delta$  are smaller. So, the new algorithm uses essentially as much as the given algorithm.

*Proof.* Repeat the private algorithm  $\mathcal{A}$  for  $k = \lceil \log \log N^3 \rceil$  times. For the  $i$ th repetition, we start from the output of the last repetition and use  $\mathcal{A}$  as a sub-procedure with privacy parameter  $\varepsilon_i = \varepsilon/2^{k+1-i}$  and  $\delta_i = \delta/2^{k+1-i}$ . (Note that the noise is decreasing so that the last step gives the best solution). We show that the last output has excess empirical risk at most  $O\left(\frac{G^2 d \log(1/\delta)}{\mu \varepsilon^2 N^2}\right)$ .

More specifically, let  $\omega_i$  be the output of the  $i$ th repetition,  $\Delta_i = \mathbb{E}[\widehat{F}(\omega_i) - \widehat{F}^*]$  and  $D_i^2 = \mathbb{E}[\|\omega_i - \omega^*\|^2]$ . As the objective function  $\widehat{F}$  is  $\mu$ -strongly convex, we know that  $\frac{1}{2}\mu D_i^2 \leq \Delta_i$  for all  $i \geq 0$ .

By the guarantee of the algorithm, there exists some constant  $c \geq 1$  such that

$$\begin{aligned} \Delta_{i+1} &= \mathbb{E}[\widehat{F}(\omega_{i+1}) - \widehat{F}^*] \\ &\leq c \frac{GD_i \sqrt{d \log(1/\delta_i)}}{\varepsilon_i N} + c \frac{G^2 d \log(1/\delta_i)}{\mu \varepsilon_i^2 N^2} \\ &\leq c \frac{G \sqrt{d \log(1/\delta_i)}}{\varepsilon_i N} \sqrt{\frac{2\Delta_i}{\mu}} + \frac{E_i}{c}, \end{aligned}$$

where we define  $E_i = 2c^2 \frac{G^2 d \log(1/\delta_i)}{\mu \varepsilon_i^2 N^2}$ .

As  $E_i/E_{i+1} = \frac{\varepsilon_{i+1}^2 \log(1/\delta_i)}{\varepsilon_i^2 \log(1/\delta_{i+1})} \leq 8$ , we can rearrange the above function and get

$$\begin{aligned} \frac{\Delta_{i+1}}{64E_{i+1}} &\leq \frac{\sqrt{\Delta_i E_i} + \frac{E_i}{c}}{64E_{i+1}} \\ &\leq \frac{E_i}{64E_{i+1}} \left( \sqrt{\frac{\Delta_i}{E_i}} + \frac{4}{c} \right) \\ &\leq \sqrt{\frac{\Delta_i}{64E_i}} + 1. \end{aligned}$$

By strong convexity one has that  $\Delta_1 \leq G^2/\mu$ , and  $E_1 = \Omega(G^2 \log^3 N / (\mu N^2)) = \Omega(G^2 / (\mu N^3))$  by the definition, so  $\Delta_1/E_1 \leq N^3$ . Then by Lemma 4.6, after  $k = \lceil \log \log N^3 \rceil$  repetitions, we get  $\frac{\Delta_k}{64E_k} \leq 16$ . This further implies that there is a solution with expected error

$$\mathbb{E}[\widehat{F}(\omega_k) - \widehat{F}^*] = O\left(\frac{G^2 d \log(1/\delta)}{\mu \varepsilon^2 N^2}\right).$$

The privacy guarantee comes directly from the basic composition theorem (See Theorem 2.7).  $\square$

We did not optimize constants in the calculations above. Now we are ready to state the main result for the strongly-convex case.

**Theorem 4.9** (Strongly Convex Case for Theorem 1.1). *Suppose  $\mathcal{K} \subset \mathbb{R}^d$  is a closed convex set of diameter  $D$  and  $\{f(\cdot, x)\}_{x \in \Xi}$  is a family of  $G$ -Lipschitz and  $\mu$ -strongly convex functions over  $\mathcal{K}_r$  where  $r = \frac{D \sqrt{d \log(1/\delta)}}{\varepsilon N}$ . For  $\varepsilon, \delta \leq 1/2$ , given any sample set  $S$  consists of  $N$  samples from  $\Xi$  and arbitrary initial point  $\omega_0 \in \mathcal{K}$ , we have an  $(\varepsilon, \delta)$ -differentially private algorithm  $\mathcal{A}$  which takes  $O\left(\frac{\varepsilon N^{\frac{3}{2}}}{d^{1/8} \log^{1/4}(1/\delta)} + \frac{\varepsilon^2 N^2}{d \log(1/\delta)}\right)$  gradient queries and outputs  $\omega_T$  such that*

$$\mathbb{E}[\widehat{F}(\omega_T) - \widehat{F}^*] = O\left(\frac{G^2 d \log(1/\delta)}{\mu \varepsilon^2 N^2}\right),$$

where  $\widehat{F}(\omega) = \frac{1}{N} \sum_{x_i \in S} f(\omega, x_i)$ ,  $\widehat{F}^* = \min_{\omega \in \mathcal{K}} \widehat{F}(\omega)$ , and the expectation is taken over the randomness of the algorithm itself.

*Proof.* By Lemma 4.5, the output  $\omega$  of Private AC–SA satisfies

$$\mathbb{E}[\widehat{F}(\omega) - \widehat{F}^*] = O\left(\frac{G^2}{\mu T} + \frac{\sigma^2 d}{B^2} + \frac{GDd^{1/4}}{T}\right).$$

By setting  $\sigma = \frac{c_2 GB\sqrt{T\log(1/\delta)}}{\varepsilon N}$  and  $T = \lceil \frac{100\varepsilon N}{c_1 d^{1/4}\sqrt{\log(1/\delta)}} \rceil$  ( $c_1, c_2$  are defined in Lemma 4.4), one has

$$\begin{aligned}\mathbb{E}[\widehat{F}(\omega) - \widehat{F}^*] &= O\left(\frac{G^2}{\mu BT} + \frac{G^2 d \log(1/\delta)}{\mu \varepsilon^2 N^2} + \frac{GDd^{1/4}}{T}\right) \\ &= O\left(\frac{G^2}{\mu BT} + \frac{G^2 d \log(1/\delta)}{\mu \varepsilon^2 N^2} + \frac{GD\sqrt{d\log(1/\delta)}}{\varepsilon N}\right)\end{aligned}$$

To ensure that Private AC–SA is  $(\varepsilon, \delta)$ -DP, we set  $B = \lceil \sqrt{\frac{\varepsilon N^2}{c_1 T} + \frac{\varepsilon^2 N^2}{d \log(1/\delta) T}} \rceil$ . By our choice of  $T$ , we have  $B \leq N/10$  and  $\varepsilon \leq c_1 B^2 T / N^2$ . Hence, we can apply Lemma 4.4 to conclude the guarantee of  $(\varepsilon, \delta)$  differential privacy.

Furthermore, we get a solution  $\omega$  such that

$$\mathbb{E}[\widehat{F}(\omega) - \widehat{F}^*] = O\left(\frac{G^2 d \log(1/\delta)}{\mu \varepsilon^2 N^2} + \frac{GD\sqrt{d\log(1/\delta)}}{\varepsilon N}\right).$$

As for the total gradient complexity of our algorithm, we are under the assumption that  $\frac{d \log(1/\delta)}{\varepsilon^2 N^2} \leq 1$ , which means that  $\frac{\varepsilon N}{d^{1/4}\sqrt{\log(1/\delta)}} \geq d^{1/4}$ , and  $T = \lceil \frac{100\varepsilon N}{c_1 d^{1/4}\sqrt{\log(1/\delta)}} \rceil = \Theta\left(\frac{\varepsilon N}{d^{1/4}\sqrt{\log(1/\delta)}}\right)$ . As for the batch size, we know  $\sqrt{\frac{\varepsilon N^2}{T}} + \frac{\varepsilon^2 N^2}{d \log(1/\delta) T} = \omega(1)$  and thus  $B = \lceil \sqrt{\frac{\varepsilon N^2}{T} + \frac{\varepsilon^2 N^2}{d \log(1/\delta) T}} \rceil = \Theta\left(\sqrt{\frac{\varepsilon N^2}{T} + \frac{\varepsilon^2 N^2}{d \log(1/\delta) T}}\right)$ , from which we get the gradient complexity is

$$BT = \Theta\left(\frac{\varepsilon N^{\frac{3}{2}}}{d^{1/8} \log^{1/4}(1/\delta)} + \frac{\varepsilon^2 N^2}{d \log(1/\delta)}\right).$$

By Lemma 4.7 we can adjust Private AC–SA and get a final solution  $\omega_T$  such that

$$\mathbb{E}[\widehat{F}(\omega_T) - \widehat{F}^*] = O\left(\frac{G^2 d \log(1/\delta)}{\mu \varepsilon^2 N^2}\right),$$

with gradient complexity  $\Theta\left(\sum_{i=1}^{\log \log N^3} \frac{(\varepsilon/2^i)N^{3/2}}{d^{1/8} \log^{1/4}(2^i/\delta)} + \frac{(\varepsilon/2^i)^2 N^2}{d \log(2^i/\delta)}\right) = \Theta\left(\frac{\varepsilon N^{\frac{3}{2}}}{d^{1/8} \log^{1/4}(1/\delta)} + \frac{\varepsilon^2 N^2}{d \log(1/\delta)}\right)$ , which completes the proof.  $\square$

## 4.2 General Non-smooth Convex Functions

In the general non-smooth case, we only assume that the family of functions  $\{f(\cdot, x)\}_{x \in \Xi}$  is  $G$ -Lipschitz and convex over  $\mathcal{K}$ . We now give a reduction from this case to the strongly-convex case, which completes our second main result.

**Lemma 4.10.** *Suppose  $\mathcal{K} \subset \mathbb{R}^d$  is a convex set of diameter  $D$  and let  $\{f(\cdot, x)\}_{x \in \Xi}$  be a family of convex functions over  $\mathcal{K}$ , which are  $G$ -Lipschitz and  $\mu$ -strongly convex. Given any sample set  $S$  consists of  $N$  samples from  $\Xi$  and other necessary inputs, suppose we have a  $(\varepsilon, \delta)$ -DP algorithm  $A$  which can output a solution  $\omega_T$  such that*

$$\mathbb{E}[\widehat{F}(\omega_T) - \widehat{F}^*] = O\left(\frac{G^2 d \log(1/\delta)}{\mu \varepsilon^2 N^2}\right),$$

where  $\widehat{F}^* = \min_{\omega \in \mathcal{K}} \widehat{F}(\omega)$ .

Then when  $\{h(\cdot, x)\}_{x \in \Xi}$  is only  $G$ -Lipschitz and convex with necessary inputs, for any sample set  $S$  of size  $N$ , we also have a  $(\varepsilon, \delta)$ -DP algorithm  $\mathcal{A}'$  which can get a solution  $\omega_T$  such that

$$\mathbb{E}[\widehat{H}(\omega_T) - \widehat{H}^*] = O\left(\frac{GD\sqrt{d \log(1/\delta)}}{\varepsilon N}\right).$$

where  $\widehat{H}(\omega) = \frac{1}{N} \sum_{x_i \in S} h(\omega, x_i)$ ,  $\widehat{H}^* = \min_{\omega \in \mathcal{K}} H(\omega)$ . The gradient complexity and privacy guarantee of  $\mathcal{A}$  and  $\mathcal{A}'$  are the same.

Moreover, the reduction also holds in the context of SCO.

*Proof.* We only consider this lemma in the context of ERM, as we can use the nearly the same argument for SCO.

Without loss of generality, we assume the initial point  $\omega_0 = 0$ . The proof of this reduction is rather simple: After getting  $\{h(\cdot, x_i)\}_{x_i \in S}$ , we only need to consider  $h_u(\omega, x) = h(\omega, x) + u\|\omega\|^2$ . Then  $h_u(\cdot, x)$  is  $u$ -strongly convex and  $O(G + uD)$ -Lipschitz for any  $x$  with  $\|\omega\|_2 \leq D$  and  $\omega \in \mathcal{K}$ .

For the case  $uD \leq G$ , we run  $\mathcal{A}$  on  $\{h_u(\cdot, x_i)\}_{x_i \in S}$  to get a solution  $\omega_T$  with loss

$$\mathbb{E}[H_u(\omega_T) - H_u^*] = O\left(\frac{G^2 d \log(1/\delta)}{u \varepsilon^2 N^2}\right),$$

where  $H_u(\omega) = \frac{1}{N} \sum_{x_i \in S} h(\omega, x_i) + u\|\omega\|^2$  and  $H_u^* = \min_{\omega \in \mathcal{K}} H_u(\omega)$ . Now by setting  $u = \Theta\left(\frac{G\sqrt{d \log(1/\delta)}}{D \varepsilon N}\right)$ , one has

$$\begin{aligned} \mathbb{E}[\widehat{H}(\omega_T) - \widehat{H}^*] &= O\left(\frac{G^2 d \log(1/\delta)}{u \varepsilon^2 N^2} + uD^2\right) \\ &= O\left(\frac{GD\sqrt{d \log(1/\delta)}}{\varepsilon N}\right). \end{aligned}$$

For the case  $uD \geq G$ , we have  $\frac{GD\sqrt{d \log(1/\delta)}}{\varepsilon N} \geq GD$  and hence we can simply output the initial point  $\omega_0$  as the solution with a loss no more than  $GD$ .  $\square$

The above reduction completes the main result of this subsection.

**Theorem 4.11** (General Convex Case for Theorem 1.1). *Suppose  $\mathcal{K} \subset \mathbb{R}^d$  is a convex set of diameter  $D$  and  $\{f(\cdot, x)\}_{x \in \Xi}$  is a family of  $G$ -Lipschitz and convex functions over  $\mathcal{K}_r$  where  $r = \frac{D\sqrt{d \log(1/\delta)}}{\varepsilon N}$ . For  $\varepsilon, \delta \leq 1/2$ , given any sample set  $S$  consists of  $N$  samples from  $\Xi$  and arbitrary initial point  $\omega_0 \in \mathcal{K}$ , we have a  $(\varepsilon, \delta)$ -differentially private algorithm  $\mathcal{A}$  which takes  $O\left(\frac{\varepsilon N^{\frac{3}{2}}}{d^{1/8} \log^{1/4}(1/\delta)} + \frac{\varepsilon^2 N^2}{d \log(1/\delta)}\right)$  gradient queries and outputs  $\omega_T$  such that*

$$\mathbb{E}[\widehat{F}(\omega_T) - \widehat{F}^*] = O\left(\frac{GD\sqrt{d \log(1/\delta)}}{\varepsilon N}\right),$$

where  $\widehat{F}^* = \min_{\omega \in \mathcal{K}} \widehat{F}(\omega)$ , and the expectation is taken over the randomness of the algorithm.

## 5 Differentially Private SCO

In this section we study SCO. We can use the iterative localization technique in [FKT20] to reduce the SCO problem to an ERM problem. More specifically, if we can solve private ERM and get a (nearly) optimal empirical loss, then we can solve private SCO with (nearly) optimal excess population loss with the following algorithm framework (Algorithm 5). See Theorem 5.1 for the corresponding formal statement.

---

**Algorithm 5:** Iterative Localized Algorithm Framework  $\mathcal{A}'$ 


---

- 1 **Input:** A family of  $G$ -Lipschitz and  $\mu$ -strongly convex function  $f : \mathcal{K} \times \Xi \rightarrow \mathbb{R}$ , initial point  $\omega_0 \in \mathcal{K}$  and privacy parameter  $\varepsilon, \delta$ .
  - 2 **Process:** Set  $k = \lceil \log N \rceil$ ;
  - 3 **for**  $i = 1, \dots, k$  **do**
  - 4     Set  $\varepsilon_i = \varepsilon/2^i, N_i = N/2^i, \eta_i = \eta/2^{5i}$ ;
  - 5     Apply  $(\varepsilon_i, \delta_i)$ -DP ERM algorithm  $\mathcal{A}_{\varepsilon_i, \delta_i}$  over  $\mathcal{K}_i = \{\omega \in \mathcal{K} : \|\omega - \omega_{i-1}\|_2 \leq 2G\eta_i N_i\}$   
with the function  $\widehat{F}_i(\omega) = \frac{1}{N_i} \sum_{j \in S_i} f(\omega, x_j) + \frac{1}{\eta_i N_i} \|\omega - \omega_{i-1}\|^2$  where  $S_i$  consists of  
 $N_i$  samples with replacement from  $\mathcal{P}$ ;
  - 6     Let  $\omega_i$  be the output of the ERM algorithm;
  - 7 **end**
  - 8 **Return:** The final iterate  $\omega_k$ ;
- 

**Theorem 5.1.** *Suppose we have an algorithm  $\mathcal{A}$  which can solve ERM under strongly convex case and gets a solution with excess empirical loss  $O(\frac{G^2}{\mu N})$  by using  $g(N)$  many gradients, then we have an algorithm  $\mathcal{A}'$  which can solve SCO under general case and gets a solution with excess population loss  $O(\frac{GD}{\sqrt{N}})$  by using  $\sum_{i=1}^{\lceil \log N \rceil} g(N/2^i)$  many gradients.*

Moreover, for  $\varepsilon, \delta \leq 1/2$ , if  $\mathcal{A}_{\varepsilon, \delta}$  is  $(\varepsilon, \delta)$ -differentially private with excess empirical loss  $O(\frac{G^2}{\mu} (\frac{1}{N} + \frac{d \log(1/\delta)}{\varepsilon^2 N^2}))$  under the strongly convex case by using  $g(N, \varepsilon, \delta)$  many gradients, then we can get  $(\varepsilon, \delta)$ -differentially private  $\mathcal{A}'$  with excess population loss  $O(GD(\frac{1}{\sqrt{N}} + \frac{\sqrt{d \log(1/\delta)}}{\varepsilon N}))$  by querying gradients at most  $\sum_{i=1}^{\lceil \log N \rceil} g(N/2^i, \varepsilon/2^i, \delta/2^i)$  times.

We only prove the bound with privacy guarantee, as the (non-private) bound can be proved with similar argument. Two technical lemmas will be proved at first, after which we will complete the proof.

**Lemma 5.2.** *Let  $\widehat{\omega}_i = \arg \min_{\omega \in \mathcal{K}} \widehat{F}_i(\omega)$ , then*

$$\mathbb{E}[\|\omega_i - \widehat{\omega}_i\|_2^2] \leq O\left(\frac{G^2 \eta_i^2 d \log(1/\delta_i)}{\varepsilon_i^2} + G^2 \eta_i^2 N_i\right).$$

*Proof.* At first, we prove that  $\widehat{\omega}_i \in \mathcal{K}_i$ . The definition of  $\widehat{\omega}_i$  implies that

$$\frac{1}{N_i} \sum_{j=1}^{N_i} f(\widehat{\omega}_i, x_j) + \frac{1}{\eta_i N_i} \|\widehat{\omega}_i - \omega_{i-1}\|_2^2 \leq \frac{1}{N_i} \sum_{j=1}^{N_i} f(\omega_{i-1}, x_j).$$

Then we know that

$$\frac{1}{\eta_i N_i} \|\widehat{\omega}_i - \omega_{i-1}\|_2^2 \leq G \|\widehat{\omega}_i - \omega_{i-1}\|_2,$$

which implies  $\widehat{\omega}_i \in \mathcal{K}_i$ .

Next, note that  $\widehat{F}_i$  is  $\lambda_i = \frac{1}{\eta_i N_i}$ -strongly convex, by the guarantee of our ERM algorithm, we know that

$$\begin{aligned} \frac{\lambda_i}{2} \mathbb{E}[\|\widehat{\omega}_i - \omega_i\|_2^2] &\leq \mathbb{E}[\widehat{F}_i(\widehat{\omega}_i) - \widehat{F}_i(\omega_i)] \\ &\leq O\left(\frac{G^2 d \log(1/\delta_i)}{\lambda_i \varepsilon_i^2 N_i^2} + \frac{G^2}{\lambda_i N_i}\right) \\ &= O\left(\frac{G^2 \eta_i d \log(1/\delta_i)}{\varepsilon_i^2 N_i} + G^2 \eta_i\right), \end{aligned}$$

which implies



$$\mathbb{E}[\|\widehat{\omega}_i - \omega_i\|_2^2] \leq O\left(\frac{G^2\eta_i^2 d \log(1/\delta_i)}{\varepsilon_i^2} + G^2\eta_i^2 N_i\right).$$

□

**Lemma 5.3.** For any  $y \in \mathcal{K}$ , we know that

$$\mathbb{E}[F(\widehat{\omega}_i) - F(y)] \leq \frac{\mathbb{E}[\|\omega_{i-1} - y\|_2^2]}{\eta_i N_i} + O(G^2\eta_i).$$

*Proof.* Let  $r(\omega, x) = f(\omega, x) + \frac{1}{\eta_i N_i} \|\omega - \omega_{i-1}\|_2^2$ ,  $R(\omega) = \mathbb{E}_{x \sim \mathcal{P}} r(\omega, x)$  and  $y^* = \arg \min_{\omega \in \mathcal{K}} R(\omega)$ . By Theorem 6 in [SSSS09], one has that

$$\begin{aligned} \mathbb{E}[R(\widehat{\omega}_i) - R(y)] &= \mathbb{E}[F(\widehat{\omega}_i) + \frac{1}{\eta_i N_i} \|\widehat{\omega}_i - \omega_{i-1}\|_2^2 - F(y) - \frac{1}{\eta_i N_i} \|y - \omega_{i-1}\|_2^2] \\ &\leq \mathbb{E}[R(\widehat{\omega}_i) - R(y^*)] \\ &\leq O(G^2\eta_i), \end{aligned}$$

which implies that

$$\begin{aligned} \mathbb{E}[F(\widehat{\omega}_i) - F(y)] &\leq O(G^2\eta_i) - \frac{1}{\eta_i N_i} \mathbb{E}[\|\widehat{\omega}_i - \omega_{i-1}\|_2^2] + \frac{1}{\eta_i N_i} \mathbb{E}[\|y - \omega_{i-1}\|_2^2] \\ &\leq O(G^2\eta_i) + \frac{1}{\eta_i N_i} \mathbb{E}[\|y - \omega_{i-1}\|_2^2]. \end{aligned}$$

□

Having these two lemmas, we can begin the proof.

*Proof of Theorem 5.1.* The privacy guarantee comes directly from the basic composition theorem (See Theorem 2.7).

Let  $S_i = \{x_j\}_{N-N/2^{i-1} \leq j \leq N-N/2^i}$ . Let  $N_i = N/2^i$ ,  $\varepsilon_i = \varepsilon/2^i$ ,  $\delta_i = \delta/2^i$  and  $\eta_i = \eta/2^{5i}$  where  $\eta$  will be defined soon. For  $i \in [k]$ , let  $\widehat{F}_i(\omega) = \sum_{x_j \in S_i} f(\omega, x_j) + \frac{1}{\eta_i N_i} \|\omega - \omega_{i-1}\|_2^2$ .

Let  $\widehat{\omega}_0 = \omega^*$ , we have

$$\mathbb{E}[F(\omega_k)] - F(\omega^*) = \sum_{i=1}^k \mathbb{E}[F(\widehat{\omega}_i) - F(\widehat{\omega}_{i-1})] + \mathbb{E}[F(\omega_k) - F(\widehat{\omega}_k)].$$

First, Lemma 5.2 implies that

$$\begin{aligned} \mathbb{E}[F(\omega_k) - F(\widehat{\omega}_k)] &\leq O(G\sqrt{\mathbb{E}[\|\omega_k - \widehat{\omega}_k\|_2^2]}) \\ &\leq O\left(\frac{G^2\eta_k \sqrt{d \log(1/\delta_k)}}{\varepsilon_k} + G^2\eta_k \sqrt{N_k}\right) \\ &= O\left(\frac{G^2\eta \sqrt{d \log(N/\delta)}}{\varepsilon N^3} + \frac{G^2\eta}{N^4}\right), \end{aligned}$$

which is negligible.

Then one has

$$\begin{aligned} \sum_{i=1}^k \mathbb{E}[F(\widehat{\omega}_i) - F(\widehat{\omega}_{i-1})] &\leq \sum_{i=1}^k \frac{\mathbb{E}[\|\widehat{\omega}_{i-1} - \omega_{i-1}\|_2^2]}{\eta_i N_i} + O(G^2\eta_i) \\ &\leq O\left(\frac{D^2}{\eta N} + \eta G^2 + \sum_{i=2}^k \left(\frac{G^2\eta_i d \log(1/\delta_i)}{\varepsilon_i^2 N_i} + G^2\eta_i\right)\right) \end{aligned}$$

$$\leq O\left(\frac{D^2}{\eta N} + \eta G^2 + \frac{G^2 \eta d \log(1/\delta)}{\varepsilon^2 N}\right).$$

By setting  $\eta = \frac{D}{G} \cdot \min\left\{\frac{1}{\sqrt{N}}, \frac{\varepsilon}{\sqrt{d \log(1/\delta)}}\right\}$ , we get the excess population loss:

$$\mathbb{E}[F(\hat{\omega}_k) - F(\omega^*)] = O\left(GD\left(\frac{1}{\sqrt{N}} + \frac{\sqrt{d \log(1/\delta)}}{N\varepsilon}\right)\right).$$

As for the gradient complexity, as we use  $g(N_i, \varepsilon_i, \delta_i)$  queries of gradients in  $i$ -th iteration, the total gradient complexity is  $\sum_{i=1}^k g(N_i, \varepsilon_i, \delta_i)$  as claimed.  $\square$

Note that Theorem 5.1 allows the ERM algorithm has an extra  $G^2/(\mu N)$  loss. This allows us to design a faster ERM algorithm compared Theorem 4.9 by choosing a different set of parameters.

**Lemma 5.4.** *Under the assumption defined in Algorithm Private AC–SA, with*

$$O\left(N + \min\left\{\sqrt{\varepsilon} N^{5/4} d^{1/8}, \frac{\varepsilon N^{3/2}}{d^{1/8} \log^{1/4}(1/\delta)}\right\}\right)$$

*gradient complexity, one can get a solution  $\omega_T$  such that*

$$\mathbb{E}[\hat{F}(\omega_T) - \hat{F}^*] = O\left(\frac{G^2}{\mu} \left(\frac{1}{N} + \frac{d \log(1/\delta)}{\varepsilon^2 N^2}\right)\right).$$

*Proof.* By Lemma 4.5, one has

$$\mathbb{E}[\hat{F}(\omega_T) - \hat{F}^*] = O\left(\frac{G^2/B + \sigma^2 d/B^2}{\mu T} + \frac{GDd^{1/4}}{T}\right).$$

Again, setting  $\sigma = \frac{c_2 GB \sqrt{T \log(1/\delta)}}{\varepsilon N}$  one has

$$\mathbb{E}[\hat{F}(\omega_T) - \hat{F}^*] = O\left(\frac{G^2}{\mu BT} + \frac{G^2 d \log(1/\delta)}{\mu \varepsilon^2 N^2} + \frac{GDd^{1/4}}{T}\right).$$

Taking  $T = 400 \lceil \min\{N^{1/2} d^{1/4}, \frac{N\varepsilon}{d^{1/4} \sqrt{\log(1/\delta)}}\} \rceil$  and using  $BT \geq N$  (which we will ensure), we have

$$\begin{aligned} \mathbb{E}[\hat{F}(\omega_T) - \hat{F}^*] &= O\left(\frac{G^2}{\mu N} + \frac{G^2 d \log(1/\delta)}{\mu \varepsilon^2 N^2} + \frac{GD}{\sqrt{N}} + \frac{GD \sqrt{d \log(1/\delta)}}{\mu \varepsilon N}\right) \\ &= O\left(\frac{G^2}{\mu} \zeta + GD \sqrt{\zeta}\right). \end{aligned}$$

where  $\zeta = \frac{1}{N} + \frac{d \log(1/\delta)}{\varepsilon^2 N^2}$ .

To ensure that Private AC–SA is  $(\varepsilon, \delta)$ -DP, we set  $B = \lceil N/T + N\sqrt{\varepsilon/T} \rceil = \Theta(N/T + N\sqrt{\varepsilon/T})$ . By our choice of  $T$ , we have  $B \leq N/10$  and  $\varepsilon \leq c_1 B^2 T/N^2$ . Hence, we can apply Lemma 4.4 to conclude  $(\varepsilon, \delta)$ -DP.

Hence, we have a  $(\varepsilon, \delta)$ -DP for ERM with loss  $O\left(\frac{G^2}{\mu} \zeta + GD \sqrt{\zeta}\right)$  with  $\zeta = \frac{1}{N} + \frac{d \log(1/\delta)}{\varepsilon^2 N^2}$ . Note however that Theorem 5.1 requires us to have a DP-ERM algorithm with loss  $O\left(\frac{G^2}{\mu} \zeta\right)$ , namely, we have the extra term  $O(GD \sqrt{\zeta})$ . To remove this term, we follow the reduction in Lemma 4.7.

We note that the exact same proof as Lemma 4.7 shows that for any  $\zeta > 0$ , if we can solve strongly ERM with loss  $O(G^2 \zeta^2 / \mu + GD \zeta)$ , then we can solve strongly ERM with loss  $O(G^2 \zeta^2 / \mu)$  by using the same number of gradient. This completes the proof.  $\square$

Before stating our result on SCO, we need the following variant of Lemma 4.7. The proof is essentially the same, we state it for future reference.

**Lemma 5.5** (Reduction to General Convex Case). *Given  $F$  is  $G$ -Lipschitz and  $\mu$ -strongly convex. Suppose for any  $\varepsilon, \delta < 1/2$ , we have an  $(\varepsilon, \delta)$ -differentially private algorithm  $\mathcal{A}$  which takes  $\omega_0$  as the initial start point and  $N$  samples i.i.d drawn from some distribution  $\mathcal{P}$ , and outputs a solution  $\omega_T$  such that*

$$\mathbb{E}[F(\omega_T) - F^*] = O\left(\frac{G^2}{\mu}\left(\frac{1}{N} + \frac{d \log(1/\delta)}{N^2 \varepsilon^2}\right) + GD\left(\frac{1}{\sqrt{N}} + \frac{\sqrt{d \log(1/\delta)}}{N \varepsilon}\right)\right),$$

where  $\omega^* = \arg \min_{\omega \in \mathcal{K}} F(\omega)$  and  $D = \|\omega_0 - \omega^*\|$ . Then by taking  $\mathcal{A}$  as sub-procedure with some modifications on parameters, we can get an  $(\varepsilon, \delta)$ -differentially private solution with excess population loss at most

$$\mathbb{E}[F(\omega_T) - F^*] = O\left(\frac{G^2}{\mu}\left(\frac{1}{N} + \frac{d \log(1/\delta)}{N^2 \varepsilon^2}\right)\right).$$

Furthermore, if  $\mathcal{A}$  uses  $g(N, \varepsilon, \delta)$  many gradients, the new algorithm uses  $\sum_{i \geq 1} g(N/2^i, \varepsilon/2^i, \delta/2^i)$  many gradients.

*Proof.* The only difference to Lemma 4.7 is that this algorithm takes  $N/2^{k+1-i}$  samples instead of  $N$  samples in the  $i$ -th step for  $k = \lceil \log \log N^3 \rceil$ , so it may have less gradient complexity. The rest of the proof is identical.  $\square$

Now, we can get the result for general convex case by Theorem 5.1 and Lemma 5.4, then extend it to strongly convex case by Lemma 5.5.

**Theorem 5.6** (DP-SCO, Theorem 1.2 restated). *Suppose  $\varepsilon, \delta \leq 1/2$ . Let  $\{f(\cdot, x)\}_{x \in \Xi}$  is convex and  $G$ -Lipschitz with respect to  $\ell_2$  norm and convex over  $\mathcal{K}_r$ , where  $r = \frac{D \sqrt{d \log(1/\delta)}}{\varepsilon N}$ , there is an  $(\varepsilon, \delta)$ -differentially private algorithm which takes*

$$O\left(N + \min\left\{\sqrt{\varepsilon} N^{5/4} d^{1/8}, \frac{\varepsilon N^{3/2}}{d^{1/8} \log^{1/4}(1/\delta)}\right\}\right)$$

gradient queries to get a solution  $\omega_T$

$$\mathbb{E}[F(\omega_T) - F(\omega^*)] = O\left(GD\left(\frac{1}{\sqrt{N}} + \frac{\sqrt{d \log(1/\delta)}}{N \varepsilon}\right)\right).$$

Moreover, if  $\{f(\cdot, x)\}_{x \in \Xi}$  is also  $\mu$ -strongly convex over  $\mathcal{K}_r$ , we can use the same gradient complexity and get a solution  $\omega$  such that:

$$\mathbb{E}[F(\omega_T) - F(\omega^*)] = O\left(\frac{G^2}{\mu}\left(\frac{d \log(1/\delta)}{\varepsilon^2 N^2} + \frac{1}{N}\right)\right).$$

## References

- [ACG<sup>+</sup>16] Martin Abadi, Andy Chu, Ian Goodfellow, H Brendan McMahan, Ilya Mironov, Kunal Talwar, and Li Zhang. Deep learning with differential privacy. In *Proceedings of the 2016 ACM SIGSAC Conference on Computer and Communications Security*, pages 308–318, 2016.
- [AFKT21] Hilal Asi, Vitaly Feldman, Tomer Koren, and Kunal Talwar. Private stochastic convex optimization: Optimal rates in  $\ell_1$  geometry. *arXiv preprint arXiv:2103.01516*, 2021.
- [BDRS18] Mark Bun, Cynthia Dwork, Guy N Rothblum, and Thomas Steinke. Composable and versatile privacy via truncated cdp. In *Proceedings of the 50th Annual ACM SIGACT Symposium on Theory of Computing*, pages 74–86, 2018.
- [BFGT20] Raef Bassily, Vitaly Feldman, Cristóbal Guzmán, and Kunal Talwar. Stability of stochastic gradient descent on nonsmooth convex losses. *arXiv preprint arXiv:2006.06914*, 2020.
- [BFTT19] Raef Bassily, Vitaly Feldman, Kunal Talwar, and Abhradeep Guha Thakurta. Private stochastic convex optimization with optimal rates. In *Advances in Neural Information Processing Systems*, pages 11282–11291, 2019.
- [BGN21] Raef Bassily, Cristóbal Guzmán, and Anupama Nandi. Non-euclidean differentially private stochastic convex optimization. *arXiv preprint arXiv:2103.01278*, 2021.
- [BST14] Raef Bassily, Adam Smith, and Abhradeep Thakurta. Private empirical risk minimization: Efficient algorithms and tight error bounds. In *2014 IEEE 55th Annual Symposium on Foundations of Computer Science*, pages 464–473. IEEE, 2014.
- [CBCG04] Nicolo Cesa-Bianchi, Alex Conconi, and Claudio Gentile. On the generalization ability of on-line learning algorithms. *IEEE Transactions on Information Theory*, 50(9):2050–2057, 2004.
- [CM08] Kamalika Chaudhuri and Claire Monteleoni. Privacy-preserving logistic regression. In *NIPS*, volume 8, pages 289–296. Citeseer, 2008.
- [CMS11] Kamalika Chaudhuri, Claire Monteleoni, and Anand D Sarwate. Differentially private empirical risk minimization. *Journal of Machine Learning Research*, 12(3), 2011.
- [DBW12] John C Duchi, Peter L Bartlett, and Martin J Wainwright. Randomized smoothing for stochastic optimization. *SIAM Journal on Optimization*, 22(2):674–701, 2012.
- [DMNS06] Cynthia Dwork, Frank McSherry, Kobbi Nissim, and Adam Smith. Calibrating noise to sensitivity in private data analysis. In *Theory of cryptography conference*, pages 265–284. Springer, 2006.
- [DR14] Cynthia Dwork and Aaron Roth. The algorithmic foundations of differential privacy. *Foundations and Trends in Theoretical Computer Science*, 9(3-4):211–407, 2014.
- [Fel16] Vitaly Feldman. Generalization of erm in stochastic convex optimization: The dimension strikes back. *arXiv preprint arXiv:1608.04414*, 2016.
- [FKT20] Vitaly Feldman, Tomer Koren, and Kunal Talwar. Private stochastic convex optimization: optimal rates in linear time. In *Proceedings of the 52nd Annual ACM SIGACT Symposium on Theory of Computing*, pages 439–449, 2020.
- [FMTT18] Vitaly Feldman, Ilya Mironov, Kunal Talwar, and Abhradeep Thakurta. Privacy amplification by iteration. In *2018 IEEE 59th Annual Symposium on Foundations of Computer Science (FOCS)*, pages 521–532. IEEE, 2018.
- [FTS17] Kazuto Fukuchi, Quang Khai Tran, and Jun Sakuma. Differentially private empirical risk minimization with input perturbation. In *International Conference on Discovery Science*, pages 82–90. Springer, 2017.

- [GL12] Saeed Ghadimi and Guanghai Lan. Optimal stochastic approximation algorithms for strongly convex stochastic composite optimization i: A generic algorithmic framework. *SIAM Journal on Optimization*, 22(4):1469–1492, 2012.
- [HRS16] Moritz Hardt, Ben Recht, and Yoram Singer. Train faster, generalize better: Stability of stochastic gradient descent. In *International Conference on Machine Learning*, pages 1225–1234. PMLR, 2016.
- [INS<sup>+</sup>19] Roger Iyengar, Joseph P Near, Dawn Song, Om Thakkar, Abhradeep Thakurta, and Lun Wang. Towards practical differentially private convex optimization. In *2019 IEEE Symposium on Security and Privacy (SP)*, pages 299–316. IEEE, 2019.
- [JNN19] Prateek Jain, Dheeraj Nagaraj, and Praneeth Netrapalli. Making the last iterate of sgd information theoretically optimal. In *Conference on Learning Theory*, pages 1752–1755. PMLR, 2019.
- [JT14] Prateek Jain and Abhradeep Guha Thakurta. (near) dimension independent risk bounds for differentially private learning. In *International Conference on Machine Learning*, pages 476–484. PMLR, 2014.
- [KJ16] Shiva Prasad Kasiviswanathan and Hongxia Jin. Efficient private empirical risk minimization for high-dimensional learning. In *International Conference on Machine Learning*, pages 488–497. PMLR, 2016.
- [KST12] Daniel Kifer, Adam Smith, and Abhradeep Thakurta. Private convex empirical risk minimization and high-dimensional regression. In *Conference on Learning Theory*, pages 25–1. JMLR Workshop and Conference Proceedings, 2012.
- [Mir17] Ilya Mironov. Rényi differential privacy. In *2017 IEEE 30th Computer Security Foundations Symposium (CSF)*, pages 263–275. IEEE, 2017.
- [Nes05] Yu Nesterov. Smooth minimization of non-smooth functions. *Mathematical programming*, 103(1):127–152, 2005.
- [RBHT09] Benjamin IP Rubinstein, Peter L Bartlett, Ling Huang, and Nina Taft. Learning in a large function space: Privacy-preserving mechanisms for svm learning. *arXiv preprint arXiv:0911.5708*, 2009.
- [Rén61] Alfréd Rényi. On measures of entropy and information. In *Proceedings of the Fourth Berkeley Symposium on Mathematical Statistics and Probability, Volume 1: Contributions to the Theory of Statistics*. The Regents of the University of California, 1961.
- [SSSS09] Shai Shalev-Shwartz, Ohad Shamir, Nathan Srebro, and Karthik Sridharan. Stochastic convex optimization. In *COLT*, 2009.
- [TTZ14] Kunal Talwar, Abhradeep Thakurta, and Li Zhang. Private empirical risk minimization beyond the worst case: The effect of the constraint set geometry. *arXiv preprint arXiv:1411.5417*, 2014.
- [TTZ15] Kunal Talwar, Abhradeep Thakurta, and Li Zhang. Nearly-optimal private lasso. In *Proceedings of the 28th International Conference on Neural Information Processing Systems-Volume 2*, pages 3025–3033, 2015.
- [WLK<sup>+</sup>17] Xi Wu, Fengan Li, Arun Kumar, Kamalika Chaudhuri, Somesh Jha, and Jeffrey Naughton. Bolt-on differential privacy for scalable stochastic gradient descent-based analytics. In *Proceedings of the 2017 ACM International Conference on Management of Data*, pages 1307–1322, 2017.
- [WYX17] Di Wang, Minwei Ye, and Jinhui Xu. Differentially private empirical risk minimization revisited: Faster and more general. In *Advances in Neural Information Processing Systems*, pages 2722–2731, 2017.
- [YNS12] Farzad Yousefian, Angelia Nedić, and Uday V Shanbhag. On stochastic gradient and subgradient methods with adaptive steplength sequences. *Automatica*, 48(1):56–67, 2012.

[ZZMW17] Jiaqi Zhang, Kai Zheng, Wenlong Mou, and Liwei Wang. Efficient private erm for smooth objectives. *arXiv preprint arXiv:1703.09947*, 2017.
